# Supplementary material for: Trazodone regulates neurotrophic/growth factors, mitogen-activated protein kinases and lactate release in human primary astrocytes
Source: Springer Nature journal article supplement (doi:10.1186/s12974-015-0446-x), 2015-12-01
Supplement: MOESM1 [file 9768948]

**Trazodone regulates neurotrophic/growth factors, mitogen-activated protein kinases and lactate release in human primary astrocytes**

Simona Daniele<sup>1#</sup>, Elisa Zappelli<sup>1#</sup>, Claudia Martini<sup>1\*</sup>.

<sup>1</sup>Department of Pharmacy, University of Pisa, Italy.

## Supplementary Figure 1

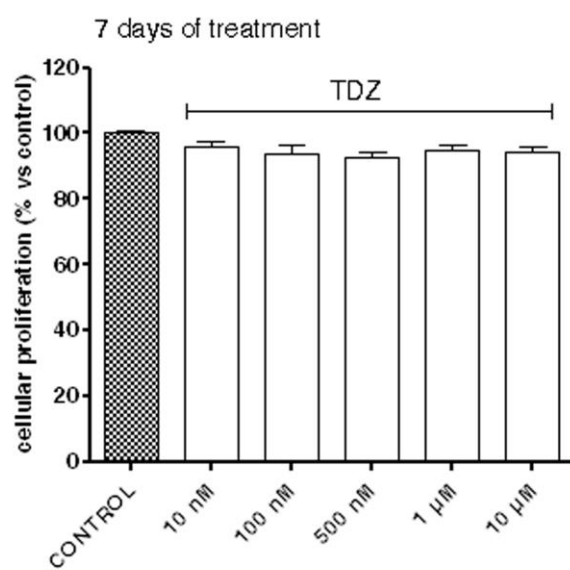

**Supplementary Fig. 1.** Human astrocytes were treated with different concentrations of TDZ for seven days. At the end of treatment, cell proliferation was measured by MTS assay. The data are expressed as percentages relative to untreated cells (control), which were set at 100%, and represent the mean  $\pm$  SEM of three independent experiments, each performed in triplicate. Statistical significance was determined using a one-way ANOVA-Tukey post hoc test.
