# Supplementary material for: Trazodone regulates neurotrophic/growth factors, mitogen-activated protein kinases and lactate release in human primary astrocytes
Source: Springer Nature journal article supplement (doi:10.1186/s12974-015-0446-x), 2015-12-01
Supplement: MOESM3 [file 9768948]

**Trazodone regulates neurotrophic/growth factors, mitogen-activated protein kinases and lactate release in human primary astrocytes**

Simona Daniele<sup>1#</sup>, Elisa Zappelli<sup>1#</sup>, Claudia Martini<sup>1\*</sup>.

<sup>1</sup>Department of Pharmacy, University of Pisa, Italy.

### Supplementary Figure 3

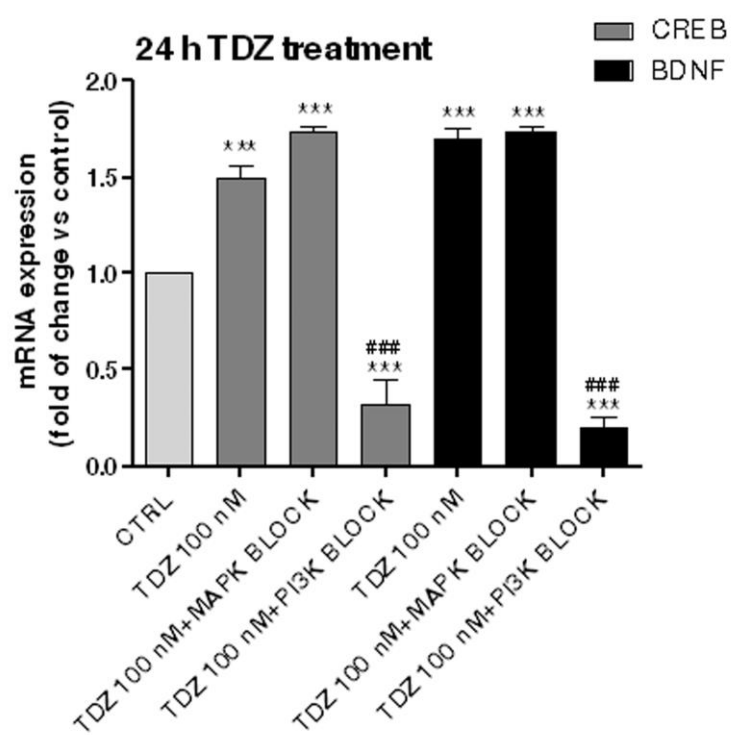

**Supplementary Fig. 3.** Human astrocytes were pre-treated with 500 nM Wortmannin (PI3K inhibitor) or 5  $\mu$ M PD98059 (MEK1 inhibitor); after 30 min, cells were incubated with TDZ (100 nM) FLUOX (10  $\mu$ M) for an additional 24 h. At the end of treatment, total RNA was extracted, and relative mRNA quantification of CREB and BDNF was performed by real-time RT-PCR. The data are expressed as fold changes vs. control and represent the mean  $\pm$  SEM of three different experiments, each performed in duplicate. Statistical significance was determined using a one-way ANOVA-Tukey HSD post hoc test: \*\*P<0.01 vs. control; ##P<0.01 vs cells not treated with the PI3K inhibitor.
